# Supplementary material for: Radiomics Detection of Pulmonary Hypertension via Texture-Based Assessments of Cardiac MRI: A Machine-Learning Model Comparison—Cardiac MRI Radiomics in Pulmonary Hypertension
Source: MDPI journal article supplement (doi:10.3390/jcm10091921), 2021-04-28
Supplement: s1 [file s1]

SUPPLEMENTAL MATERIAL

# Radiomics Detection of Pulmonary Hypertension via Texture-Based Assessments of Cardiac MRI: A Machine-Learning Model Comparison—Cardiac MRI Radiomics in Pulmonary Hypertension

**Figure S1.** Myocardial mask segmentation. A single mid ventricular short-axis slice from balanced 2-D steady state free precision cine cardiac MRI shows generation of left ventricular myocardial mask (red).

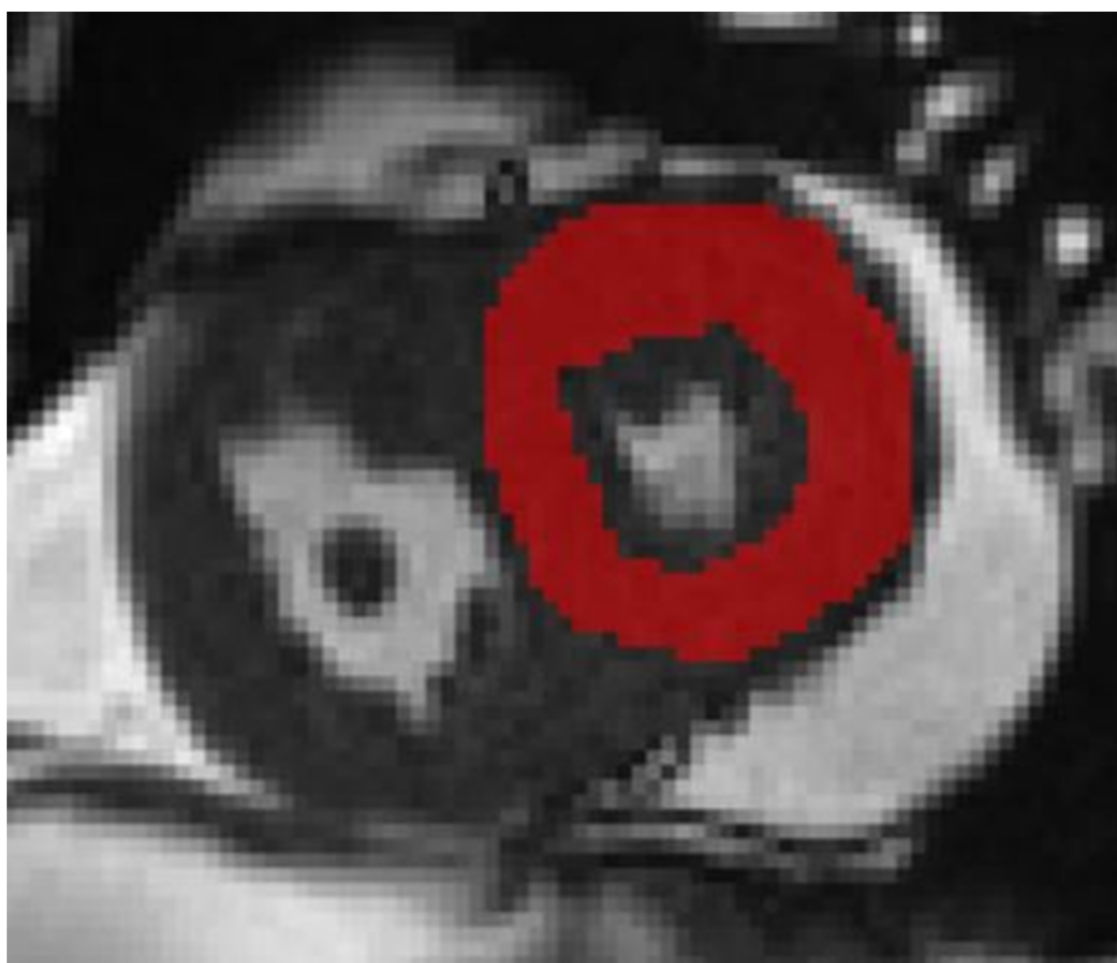

**Table S1.** Feature importance for texture variables for whole group for best performing model where feature importance is defined (Ridge with full feature set).

| Feature             | Importance  |
|---------------------|-------------|
| eslv_GeoRf          | 100         |
| eslv_GeoLsz         | 38.24698877 |
| eslv_GeoW5b         | 32.81326741 |
| eslv_S_2_2_Correlat | 30.20943885 |
| eslv_WavEnLH_s_4    | 29.42206805 |
| eslv_GeoM2y         | 22.6401386  |
| eslv_Perc.01.       | 22.21651047 |

|                     |             |
|---------------------|-------------|
| eslv_GeoW7          | 18.06157753 |
| eslv_S_3_3_Correlat | 17.43654819 |
| eslv_WavEnHH_s_2    | 16.89151075 |

Eslv- End-systolic LV mask.

**Table S2.** Feature importance for texture variables for pulmonary hypertension sub-group for best performing model where feature importance is defined (Ridge with full feature set).

| Feature            | Importance |
|--------------------|------------|
| eslv_WavEnHH_s_1   | 100.000    |
| eslv_WavEnHH_s_2   | 92.573     |
| eslv_WavEnHL_s_4   | 86.476     |
| eslv_GeoRf         | 84.545     |
| eslv_WavEnHH_s_3   | 82.088     |
| eslv_Teta3         | 68.262     |
| eslv_GeoS2         | 67.557     |
| eslv_GeoW10        | 66.680     |
| eslv_Kurtosis      | 63.359     |
| eslv_S_0_5_DifVarn | 61.528     |

Eslv- End-systolic LV mask.
